# Supplementary material for: JAG: A Computational Tool to Evaluate the Role of Gene-Sets in Complex Traits
Source: Genes (Basel). 2015 May 14;6(2):238–51. doi: 10.3390/genes6020238 (PMC4488663; doi:10.3390/genes6020238)
Supplement: Supplementary File 1 [file genes-06-00238-s001.xlsx]

## Sheet: Table S1
Table S1. List of 97 previously associated genes.
OFF_SYMBOL	ENTREZ_GENE_ID
IL10	3586
IL19	29949
IL2RA	3559
GPR65	8477
TYK2	7297
ICAM1	3383
ICAM3	3385
IL23R	149233
PTPN22	26191
CD244	51744
TNFSF18	8995
TNFSF4	7292
FASLG	356
ATG16L1	55054
IRF1	3659
CSF2	1437
IL3	3562
IRGM	345611
IL12B	3593
TNF	7124
LST1	7940
LTB	4050
LTA	4049
NCR3	259197
PRDM1	639
CCR6	1235
IKZF1	10320
ZPBP	11055
FIGNL1	63979
TNFSF15	9966
TNFSF8	944
CREM	1390
NOD2	64127
IKZF3	22806
ICOSLG	23308
GCKR	2646
THADA	63892
PLCL1	5334
ERAP2	64167
CARD9	64170
SNAPC4	6621
GALC	2581
APOBR	55911
IL27	246778
SULT1A2	6799
SULT1A1	6817
SH2B1	25970
FUT2	2524
RASIP1	54922
RTEL1	51750
YDJC	150223
LACC1	55765
MST1	4485
GPX1	2876
BSN	8927
SLC22A4	6583
MCCD1	401250
MUC19	283463
LACC1	144811
GSDML	55876
ZPBP2	124626
MLX	6945
VAMP3	9341
SCAMP3	10067
MUC1	4582
DENND1B	163486
DNMT3A	1788
REL	5966
IL18RAP	8807
TMEM174	134288
NDFIP1	80762
BACH2	60468
TAGAP	117289
UBE2D1	7321
ZMIZ1	57178
PRDX5	25824
ESRRA	2101
ZFP36L1	677
SMAD3	4088
CCL2	6347
CCL7	6354
MTMR3	8897
TAB1	10454
ITLN1	55600
KIF21B	23046
PTGER4	5734
CDKAL1	54901
HLA-DQA2	3118
JAK2	3717
ZNF365	22891
NKX2-3	159296
C11orf30	56946
LRRK2	120892
STAT3	6774
PTPN2	5771
GPX4	2879
SBNO2	22904

## Sheet: Table S2
Table S2. List of 53 benchmark gene-sets from analysis in genetrial.
Gene Set	# Genes
KEGG_CYTOKINE_CYTOKINE_RECEPTOR_INTERACTION	267
BIOCARTA_INFLAM_PATHWAY	29
KEGG_JAK_STAT_SIGNALING_PATHWAY	155
BIOCARTA_CYTOKINE_PATHWAY	21
KEGG_NOD_LIKE_RECEPTOR_SIGNALING_PATHWAY	62
KEGG_ALLOGRAFT_REJECTION	38
BIOCARTA_DC_PATHWAY	22
KEGG_LEISHMANIA_INFECTION	72
KEGG_TYPE_I_DIABETES_MELLITUS	44
KEGG_ASTHMA	30
BIOCARTA_IL22BP_PATHWAY	16
BIOCARTA_IL10_PATHWAY	17
BIOCARTA_NO2IL12_PATHWAY	17
BIOCARTA_IL6_PATHWAY	22
BIOCARTA_IL12_PATHWAY	23
KEGG_NATURAL_KILLER_CELL_MEDIATED_CYTOTOXICITY	137
BIOCARTA_FREE_PATHWAY	10
BIOCARTA_IL2RB_PATHWAY	38
REACTOME_CYTOSOLIC_SULFONATION_OF_SMALL_MOLECULES	11
ST_STAT3_PATHWAY	11
BIOCARTA_ASBCELL_PATHWAY	12
BIOCARTA_CTL_PATHWAY	15
BIOCARTA_ERYTH_PATHWAY	15
BIOCARTA_GRANULOCYTES_PATHWAY	14
BIOCARTA_HSP27_PATHWAY	15
BIOCARTA_IL3_PATHWAY	15
BIOCARTA_STEM_PATHWAY	15
KEGG_GRAFT_VERSUS_HOST_DISEASE	42
KEGG_HEMATOPOIETIC_CELL_LINEAGE	88
KEGG_SULFUR_METABOLISM	13
REACTOME_DEATH_RECEPTOR_SIGNALLING	13
REACTOME_SIGNALING_BY_TGF_BETA	15
SA_MMP_CYTOKINE_CONNECTION	15
KEGG_INTESTINAL_IMMUNE_NETWORK_FOR_IGA_PRODUCTION	48
BIOCARTA_LAIR_PATHWAY	17
BIOCARTA_PML_PATHWAY	17
KEGG_AUTOIMMUNE_THYROID_DISEASE	53
BIOCARTA_TGFB_PATHWAY	19
BIOCARTA_TH1TH2_PATHWAY	19
BIOCARTA_TID_PATHWAY	19
REACTOME_CHEMOKINE_RECEPTORS_BIND_CHEMOKINES	55
BIOCARTA_TOB1_PATHWAY	21
BIOCARTA_NFKB_PATHWAY	23
BIOCARTA_NTHI_PATHWAY	24
BIOCARTA_TPO_PATHWAY	24
BIOCARTA_STRESS_PATHWAY	25
KEGG_ADIPOCYTOKINE_SIGNALING_PATHWAY	67
ST_INTERLEUKIN_4_PATHWAY	26
KEGG_CHEMOKINE_SIGNALING_PATHWAY	190
BIOCARTA_NKT_PATHWAY	28
KEGG_CELL_ADHESION_MOLECULES_CAMS	134
KEGG_FC_EPSILON_RI_SIGNALING_PATHWAY	79
BIOCARTA_IL1R_PATHWAY	33

## Sheet: Table S3
Table S3. Overlap in detected gene-sets between tools.
geneset	# matches	prev associated	JAG	GATES	GRASS	PLINK DEFAULT	PLINK JAG SETTINGS
KEGG_JAK_STAT_SIGNALING_PATHWAY	5	yes	Y	Y	Y	Y	Y
KEGG_CYTOKINE_CYTOKINE_RECEPTOR_INTERACTION	5	yes	Y	Y	Y	Y	Y
BIOCARTA_NKT_PATHWAY	4	yes	Y	Y	Y	N	Y
BIOCARTA_TH1TH2_PATHWAY	4	yes	Y	Y	Y	N	Y
KEGG_NOD_LIKE_RECEPTOR_SIGNALING_PATHWAY	4	yes	Y	Y	N	Y	Y
REACTOME_SIGNALLING_BY_NGF	3	no	Y	Y	N	N	Y
KEGG_ECM_RECEPTOR_INTERACTION	3	no	Y	Y	N	N	Y
KEGG_N_GLYCAN_BIOSYNTHESIS	3	no	Y	N	Y	N	Y
KEGG_MAPK_SIGNALING_PATHWAY	3	no	Y	N	Y	N	Y
BIOCARTA_IL6_PATHWAY	2	yes	Y	N	N	N	Y
BIOCARTA_P35ALZHEIMERS_PATHWAY	2	no	Y	N	N	N	Y
BIOCARTA_BIOPEPTIDES_PATHWAY	2	no	Y	N	N	N	Y
BIOCARTA_ERK_PATHWAY	2	no	Y	N	N	N	Y
KEGG_OOCYTE_MEIOSIS	2	no	Y	N	N	N	Y
REACTOME_CELL_SURFACE_INTERACTIONS_AT_THE_VASCULAR_WALL	2	no	Y	N	N	N	Y
ST_STAT3_PATHWAY	2	yes	Y	N	N	N	Y
REACTOME_PLATELET_DEGRANULATION	2	no	Y	N	N	N	Y
KEGG_CALCIUM_SIGNALING_PATHWAY	2	no	Y	N	N	N	Y
REACTOME_HEMOSTASIS	2	no	Y	N	N	N	Y
REACTOME_NEURORANSMITTER_RECEPTOR_BINDING_AND_DOWNSTREAM_TRANSMISSION_IN_THE_POSTSYNAPTIC_CELL	2	no	Y	N	N	N	Y
REACTOME_CASPASE_MEDIATED_CLEAVAGE_OF_CYTOSKELETAL_PROTEINS	2	no	Y	N	N	N	Y
REACTOME_ACTIVATION_OF_NMDA_RECEPTOR_UPON_GLUTAMATE_BINDING_AND_POSTSYNAPTIC_EVENTS	2	no	Y	N	N	N	Y
KEGG_RIG_I_LIKE_RECEPTOR_SIGNALING_PATHWAY	2	no	N	Y	N	N	Y
KEGG_CELL_ADHESION_MOLECULES_CAMS	1	yes	Y	N	N	N	N
BIOCARTA_IL3_PATHWAY	1	yes	Y	N	N	N	N
REACTOME_INTEGRIN_CELL_SURFACE_INTERACTIONS	1	no	N	Y	N	N	N
ST_PHOSPHOINOSITIDE_3_KINASE_PATHWAY	1	no	N	Y	N	N	N
BIOCARTA_HER2_PATHWAY	1	no	N	Y	N	N	N
KEGG_ADIPOCYTOKINE_SIGNALING_PATHWAY	1	yes	N	Y	N	N	N
REACTOME_P75_NTR_RECEPTOR_MEDIATED_SIGNALLING	1	no	N	Y	N	N	N
ST_DIFFERENTIATION_PATHWAY_IN_PC12_CELLS	1	no	N	Y	N	N	N
KEGG_VASOPRESSIN_REGULATED_WATER_REABSORPTION	1	no	N	N	Y	N	N
ST_G_ALPHA_I_PATHWAY	1	no	N	N	Y	N	N
KEGG_ONE_CARBON_POOL_BY_FOLATE	1	no	N	N	Y	N	N
BIOCARTA_TPO_PATHWAY	1	yes	N	N	Y	N	N

## Sheet: Table S4
Table S4. Overlap in detected genes between tools.
gene_name	# matches	prev. Assoc	JAG	GATES	SETSCREEN	VEGAS
STAT3	4	yes	Y	Y	Y	Y
IL23R	4	yes	Y	Y	Y	Y
NOD2	4	yes	Y	Y	Y	Y
AMT	4	no	Y	Y	Y	Y
CYLD	4	no	Y	Y	Y	Y
DAG1	3	no	Y	N	Y	Y
CCL18	3	no	Y	N	Y	Y
CUL2	3	no	N	Y	Y	Y
BSG	2	no	Y	Y	N	N
TNKS	2	no	Y	N	N	Y
TNFSF15	1	yes	Y	N	N	N
GCS1	1	no	Y	N	N	N
GCKR	1	yes	N	Y	N	N
CREM	1	yes	N	Y	N	N
NKD1	1	no	N	Y	N	N
IL12RB2	1	no	N	Y	N	N
PGM1	1	no	N	Y	N	N
ACSL6	1	no	N	Y	N	N
GPX1	1	no	N	N	N	Y
RHOA	1	no	N	N	N	Y
